# Supplementary material for: A complex hydride lithium superionic conductor for high-energy-density all-solid-state lithium metal batteries
Source: PubMed Central journal article supplement (PMC6403359; doi:10.1038/s41467-019-09061-9), 2019-03-06
Supplement: 41467_2019_9061_MOESM1_ESM.pdf [file 41467_2019_9061_MOESM1_ESM.pdf]

**A complex hydride lithium superionic conductor for high-energy-density  
all-solid-state lithium metal batteries**

Kim *et al.*

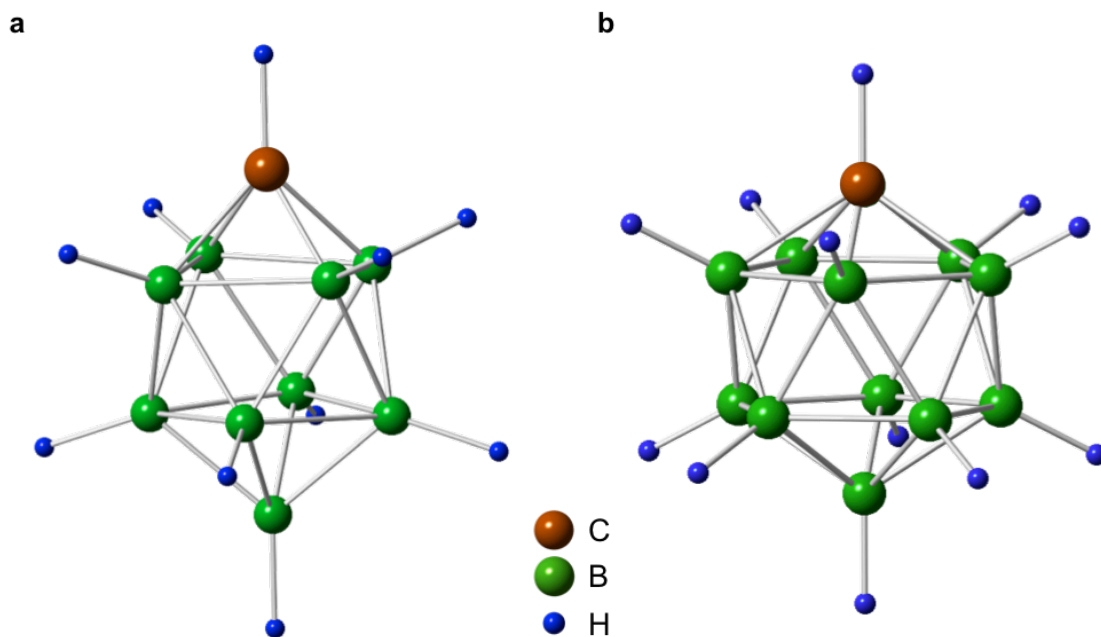

**Supplementary Figure 1 | Structures of *closo*-type (cage-like) complex anions. a,b,** Geometries of **(a)**  $(\text{CB}_9\text{H}_{10})^-$  and **(b)**  $(\text{CB}_{11}\text{H}_{12})^-$  complex anions. The brown, green, and blue spheres represent C, B, and H atoms, respectively.

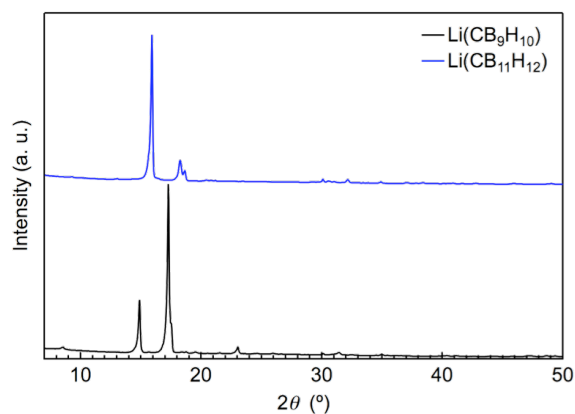

**Supplementary Figure 2 | Structures of starting materials.** XRD patterns of  $\text{Li}(\text{CB}_9\text{H}_{10})$  and  $\text{Li}(\text{CB}_{11}\text{H}_{12})$  at room temperature. Crystal systems, space groups, and lattice parameters are summarized in Supplementary Table 2.

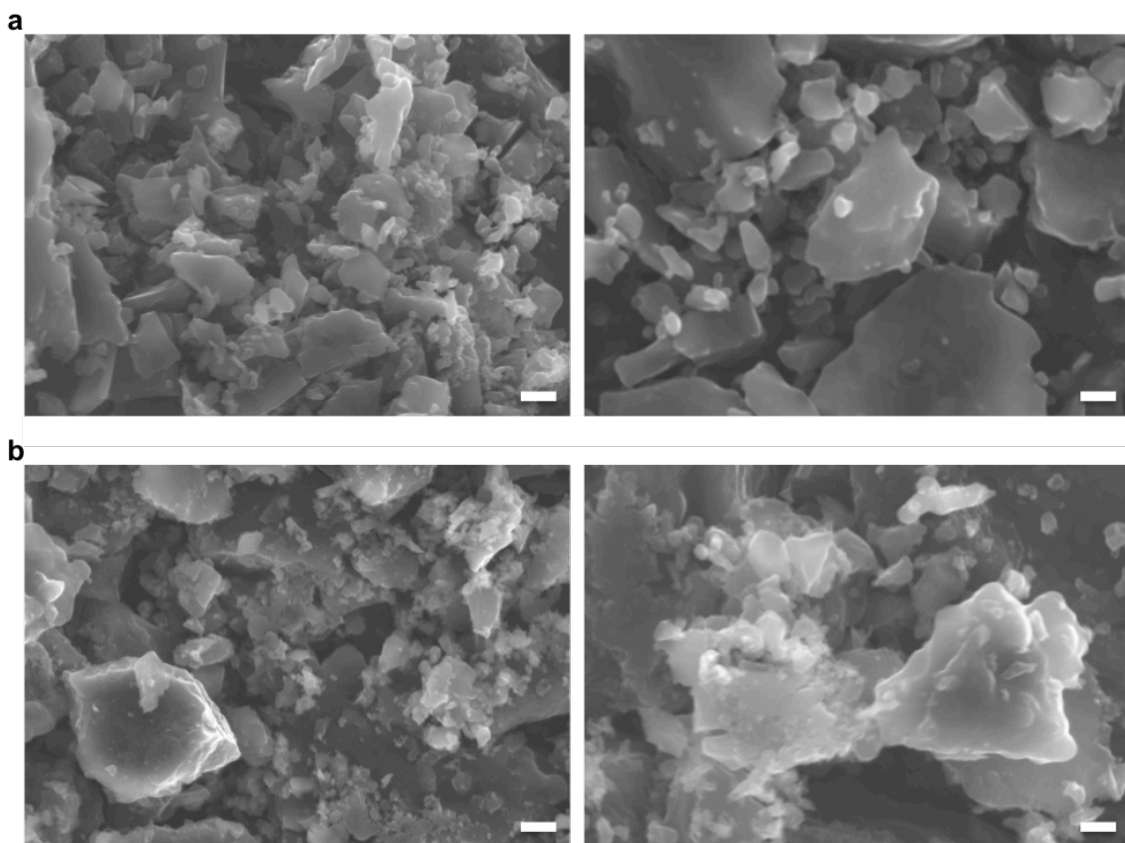

**Supplementary Figure 3 | Morphologies and particle sizes of starting materials. a,b,** SEM images of **(a)** Li(CB<sub>9</sub>H<sub>10</sub>) and **(b)** Li(CB<sub>11</sub>H<sub>12</sub>). Scale bars, 20  $\mu$ m.

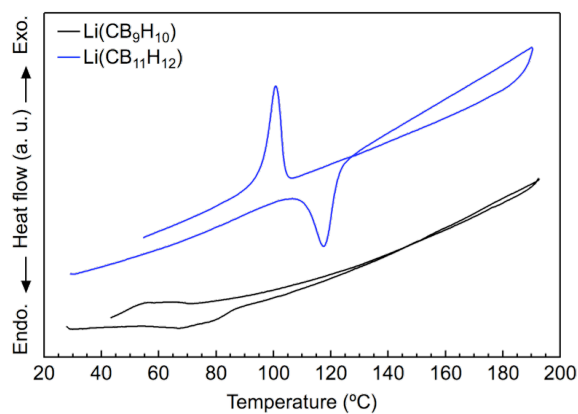

**Supplementary Figure 4 | Phase transitions of starting materials.** DTA profiles of Li(CB<sub>9</sub>H<sub>10</sub>) and Li(CB<sub>11</sub>H<sub>12</sub>). The phase transition temperatures are summarized in Supplementary Table 1.

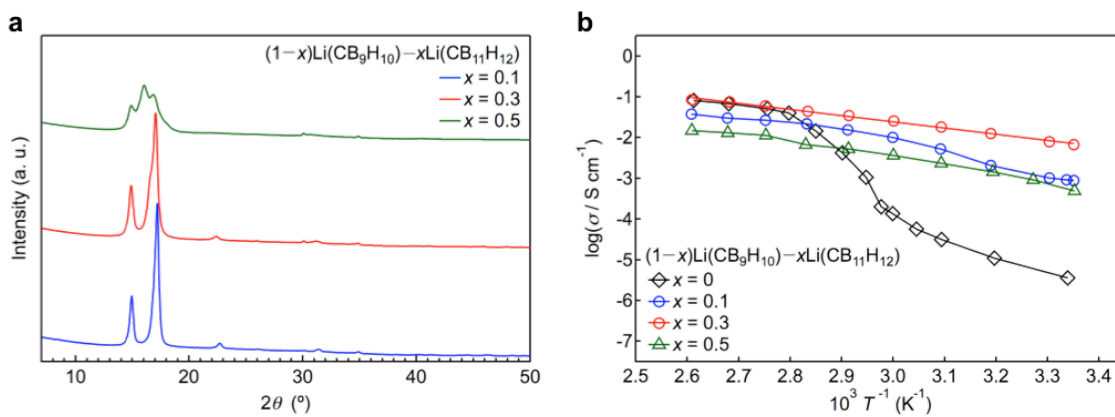

**Supplementary Figure 5 | Structures and ionic conductivities of  $x\text{Li}(\text{CB}_9\text{H}_{10})-(1-x)\text{Li}(\text{CB}_{11}\text{H}_{12})$ . a,b, (a) XRD profiles and (b) ionic conductivities of  $x\text{Li}(\text{CB}_9\text{H}_{10})-(1-x)\text{Li}(\text{CB}_{11}\text{H}_{12})$  ( $x = 0.1, 0.3$ , and  $0.5$ ).**

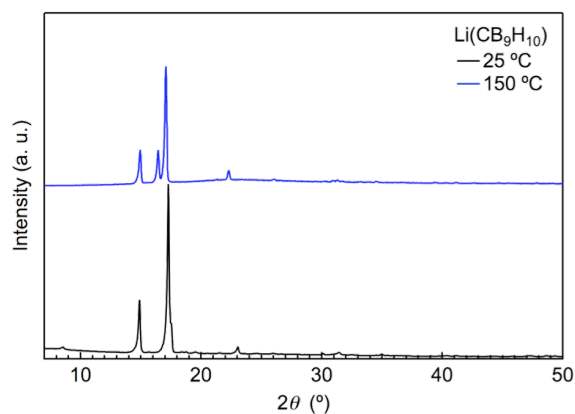

**Supplementary Figure 6 | Structure change after phase transition of Li(CB<sub>9</sub>H<sub>10</sub>).** XRD profiles of Li(CB<sub>9</sub>H<sub>10</sub>) at 25 and 150 °C. The high-*T* phase of Li(CB<sub>9</sub>H<sub>10</sub>) belongs to the space group *P*31*c* in the hexagonal symmetry<sup>1</sup>. Crystal systems, space groups, and lattice parameters are summarized in Supplementary Table 2.

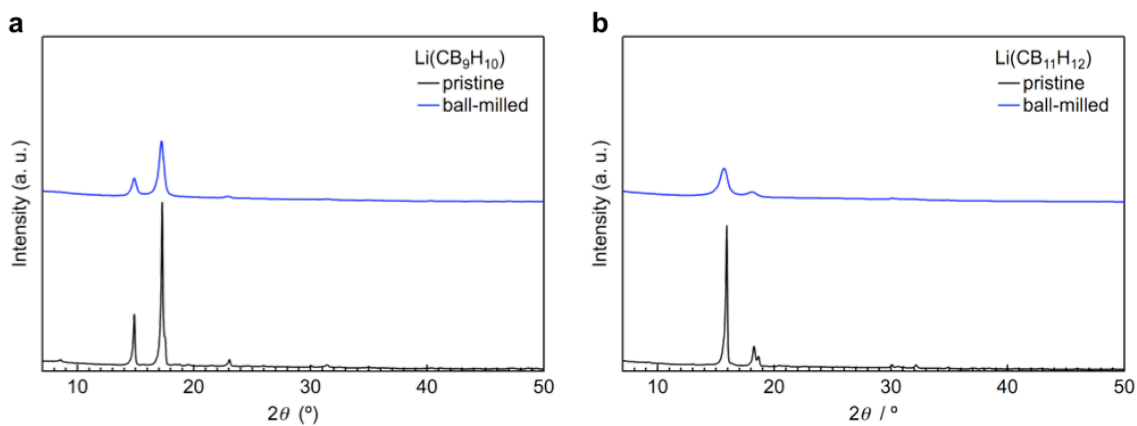

**Supplementary Figure 7 | Structure change of starting materials after mechanical ball-milling. a,b,** XRD profiles of **(a)** Li(CB<sub>9</sub>H<sub>10</sub>) and **(b)** Li(CB<sub>11</sub>H<sub>12</sub>) before and after mechanical ball-milling at 400 rpm for 20 h.



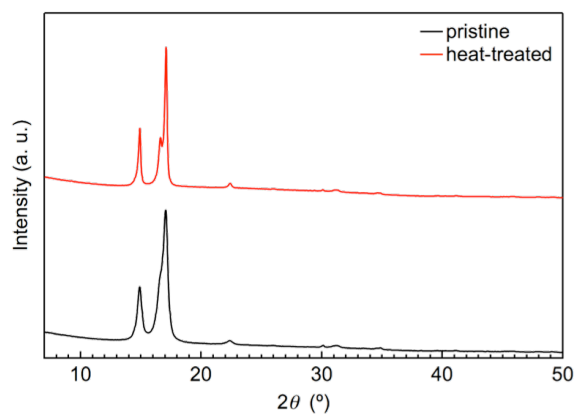

**Supplementary Figure 8 | Thermal stability of  $0.7\text{Li}(\text{CB}_9\text{H}_{10})-0.3\text{Li}(\text{CB}_{11}\text{H}_{12})$ .** XRD profiles of  $0.7\text{Li}(\text{CB}_9\text{H}_{10})-0.3\text{Li}(\text{CB}_{11}\text{H}_{12})$  before and after heat-treatment at 473 K for 12 h.

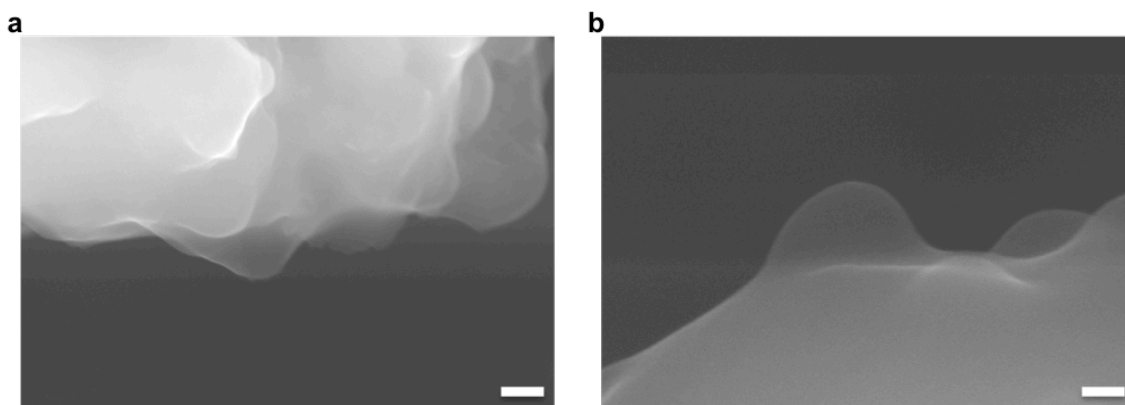

**Supplementary Figure 9 | Morphology of the prepared sample. a,b,** FE-SEM images of  $0.7\text{Li}(\text{CB}_9\text{H}_{10})-0.3\text{Li}(\text{CB}_{11}\text{H}_{12})$ . The  $0.7\text{Li}(\text{CB}_9\text{H}_{10})-0.3\text{Li}(\text{CB}_{11}\text{H}_{12})$  particles are interconnected with very smooth edges. Scale bars,  $1\ \mu\text{m}$ .

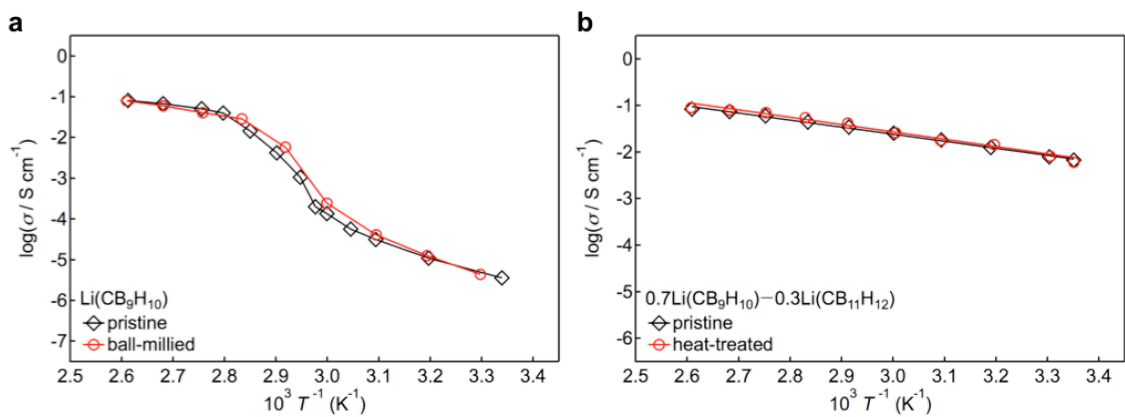

**Supplementary Figure 10 | Effects of ball-milling and heat-treatment on conductivity.**

**a,b**, Ionic conductivities of **(a)** Li(CB<sub>9</sub>H<sub>10</sub>) before and after ball-milling at 400 rpm for 20 h and **(b)** 0.7Li(CB<sub>9</sub>H<sub>10</sub>)-0.3Li(CB<sub>11</sub>H<sub>12</sub>) before and after heat-treatment at 473 K for 12 h.

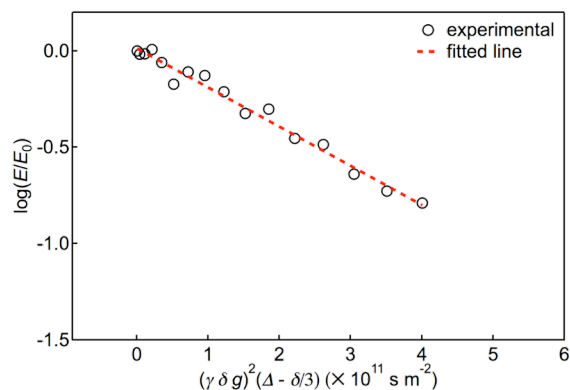

**Supplementary Figure 11 | Lithium self-diffusion coefficient of  $0.7\text{Li}(\text{CB}_9\text{H}_{10})-0.3\text{Li}(\text{CB}_{11}\text{H}_{12})$ .** Stimulated echo attenuation plot of  $0.7\text{Li}(\text{CB}_9\text{H}_{10})-0.3\text{Li}(\text{CB}_{11}\text{H}_{12})$  at  $25^\circ\text{C}$ . The self-diffusion coefficient was estimated using the Stejskal and Tanner equation<sup>2,3</sup>. The diffusion time ( $\Delta$ ) was set to be short enough (20 ms) to avoid finite crystallite size effects. The pulsed field gradient time ( $\delta$ ) was fixed at 5 ms and the gradient strength ( $g$ ) was varied from 36.2 to 900  $\text{G cm}^{-1}$  (16 steps).  $^1\text{H}$  NMR analyses confirmed no contribution of hydrogen diffusion to ionic diffusion.

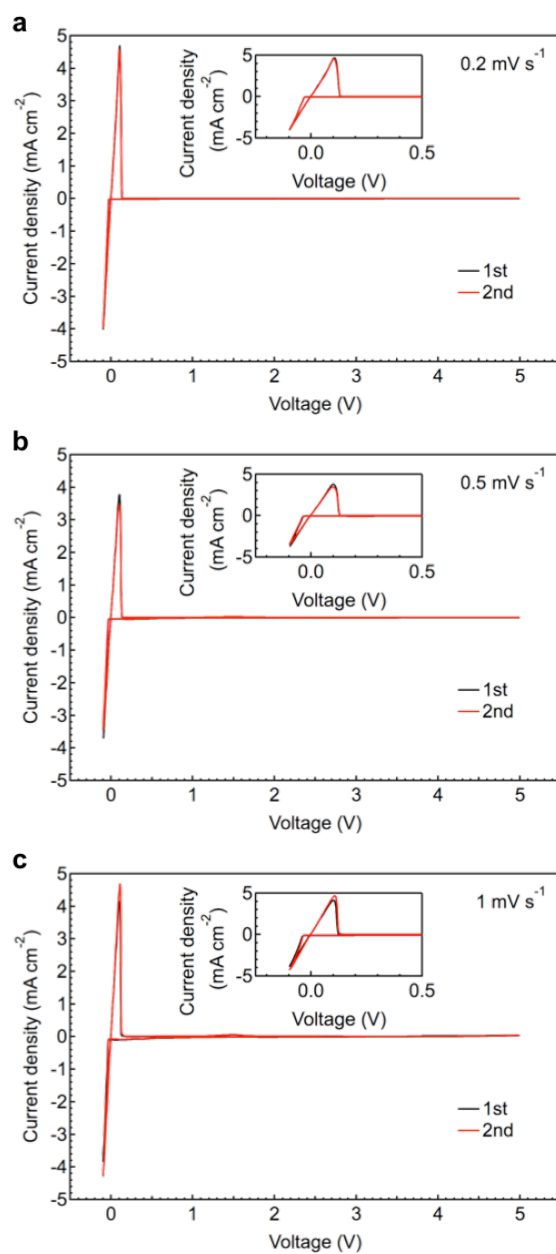

**Supplementary Figure 12 | Electrochemical stability of 0.7Li(CB<sub>9</sub>H<sub>10</sub>)-0.3Li(CB<sub>11</sub>H<sub>12</sub>).** **a–c**, CV curves of Mo/0.7Li(CB<sub>9</sub>H<sub>10</sub>)-0.3Li(CB<sub>11</sub>H<sub>12</sub>)/Li cells at scan rates of **(a)** 0.2 mV s<sup>-1</sup>, **(b)** 0.5 mV s<sup>-1</sup>, and **(c)** 1 mV s<sup>-1</sup> during 2 cycles. Insets show the magnified plots in the low-voltage region.

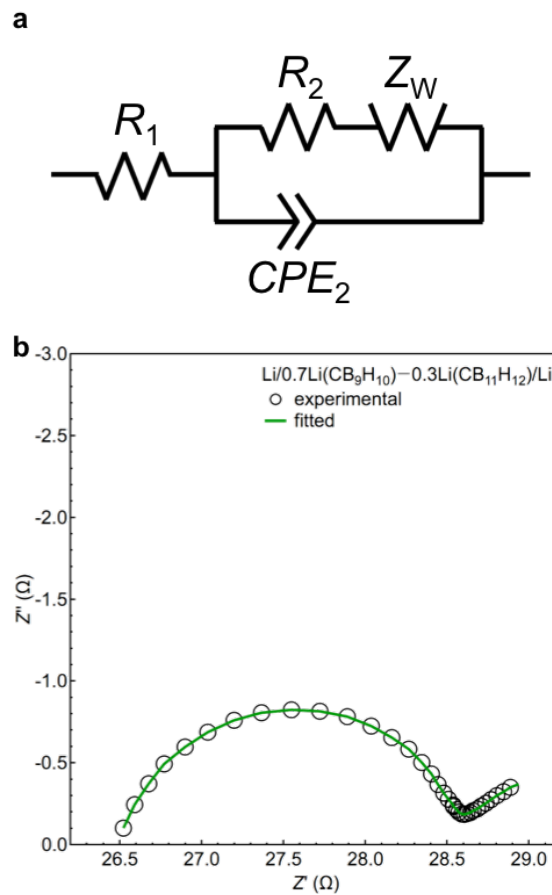

**Supplementary Figure 13 | Interfacial resistance between the 0.7Li(CB<sub>9</sub>H<sub>10</sub>)-0.3Li(CB<sub>11</sub>H<sub>12</sub>) solid electrolyte and the lithium metal anode. a, Equivalent circuit used for fitting. b, Nyquist plot and fitted curve of a Li/0.7Li(CB<sub>9</sub>H<sub>10</sub>)-0.3Li(CB<sub>11</sub>H<sub>12</sub>)/Li cell.**

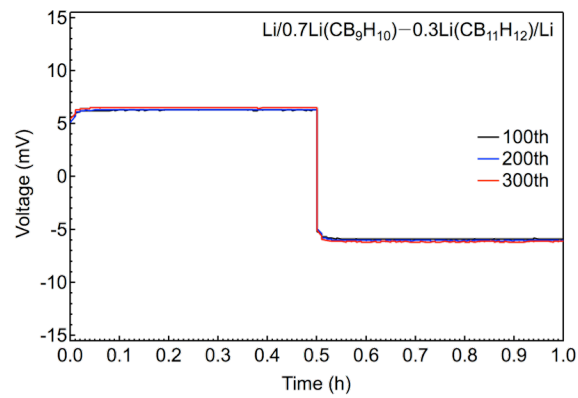

**Supplementary Figure 14 | Stability of lithium ion transfer across the interface between the 0.7Li(CB<sub>9</sub>H<sub>10</sub>)-0.3Li(CB<sub>11</sub>H<sub>12</sub>) solid electrolyte and the lithium metal anode. Galvanostatic cycling profiles of a Li/0.7Li(CB<sub>9</sub>H<sub>10</sub>)-0.3Li(CB<sub>11</sub>H<sub>12</sub>)/Li cell at 0.2 mA cm<sup>-2</sup>.**

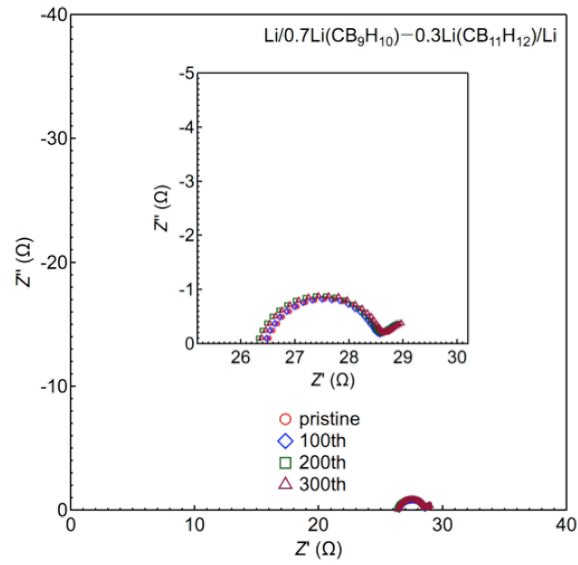

**Supplementary Figure 15 | Interfacial resistances between the 0.7Li(CB<sub>9</sub>H<sub>10</sub>)-0.3Li(CB<sub>11</sub>H<sub>12</sub>) solid electrolyte and the lithium metal anode.** Nyquist plots of a Li/0.7Li(CB<sub>9</sub>H<sub>10</sub>)-0.3Li(CB<sub>11</sub>H<sub>12</sub>)/Li cell before cycling and after 100, 200, and 300 cycles.



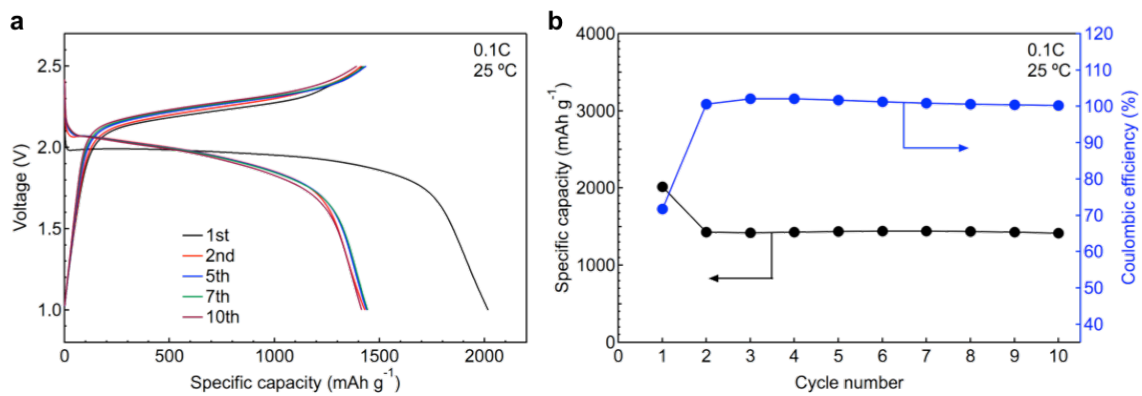

**Supplementary Figure 16 | Discharge–charge performances for prolonged cycles. a,** Discharge–charge profiles of a S/0.7Li(CB<sub>9</sub>H<sub>10</sub>)–0.3Li(CB<sub>11</sub>H<sub>12</sub>)/Li cell for a rate of 0.1C at 25 °C. **b,** Cycling performance for a rate of 0.1C at 25 °C.

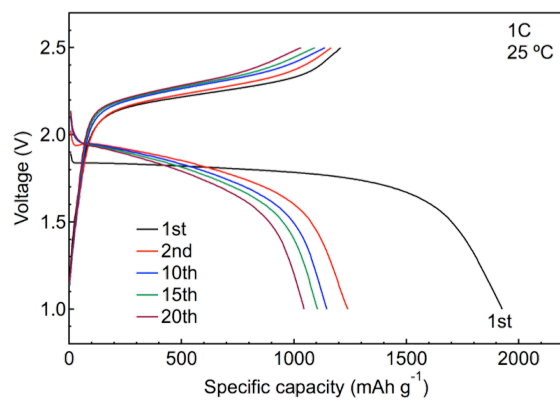

**Supplementary Figure 17 | Discharge-charge profiles for prolonged cycles.** Discharge-charge profiles of a S/0.7Li(CB<sub>9</sub>H<sub>10</sub>)-0.3Li(CB<sub>11</sub>H<sub>12</sub>)/Li cell for a rate of 1C at 25 °C.

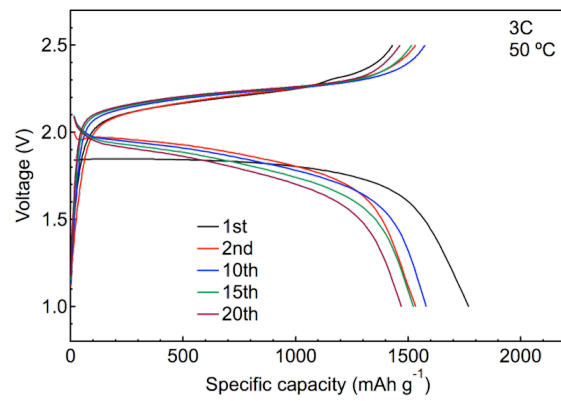

**Supplementary Figure 18 | Discharge-charge profiles for prolonged cycles.** Discharge-charge profiles of a S/0.7Li(CB<sub>9</sub>H<sub>10</sub>)-0.3Li(CB<sub>11</sub>H<sub>12</sub>)/Li cell for a discharging rate of 3C and a charging rate of 1C at 50 °C.

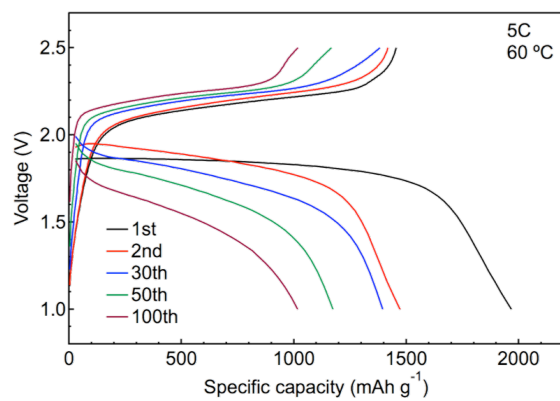

**Supplementary Figure 19 | Discharge-charge profiles for prolonged cycles.** Discharge-charge profiles of a S/0.7Li(CB<sub>9</sub>H<sub>10</sub>)-0.3Li(CB<sub>11</sub>H<sub>12</sub>)/Li cell for a discharging rate of 5C and a charging rate of 1C at 60°C.

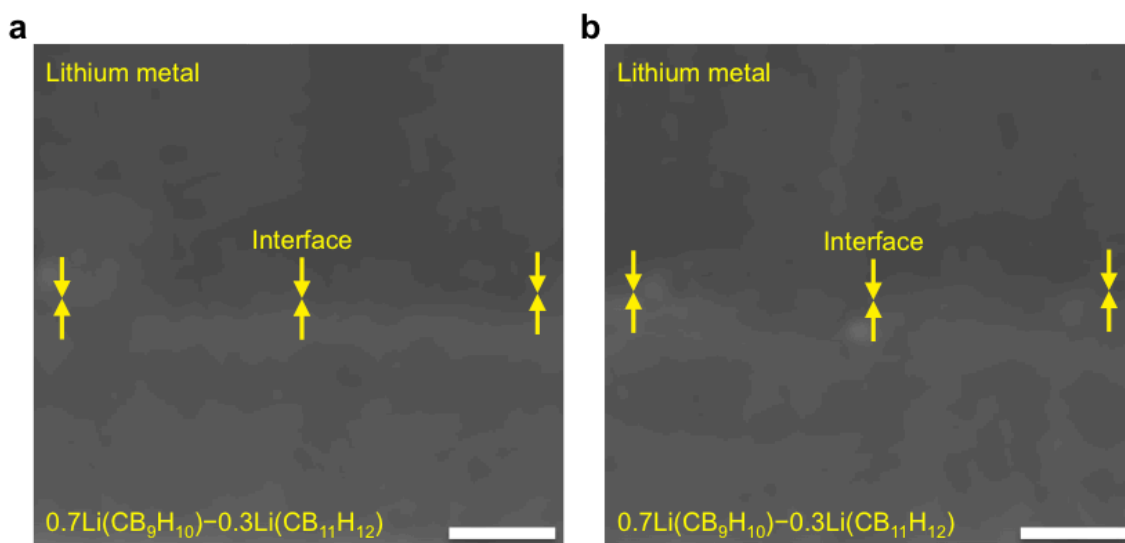

**Supplementary Figure 20 | Stability of the  $0.7\text{Li}(\text{CB}_9\text{H}_{10})-0.3\text{Li}(\text{CB}_{11}\text{H}_{12})/\text{Li}$  interface after cycling. a,b**, FE-SEM images of the  $0.7\text{Li}(\text{CB}_9\text{H}_{10})-0.3\text{Li}(\text{CB}_{11}\text{H}_{12})/\text{Li}$  interface for multiple measurement regions after 100 cycles. Scale bars, 20  $\mu\text{m}$ .

**Supplementary Table 1 | Phase transition temperatures ( $T_{\text{trans}}$ ) of *closo*-type complex hydrides, lithium ion conductivities of low- and high- $T$  phases, and activation energies of high- $T$  phases. The phase transition temperature is defined as the temperature at which the phase transition finishes in the heating process or starts in the cooling process.**

| Material                                                                             | $T_{\text{trans}}$<br>( $^{\circ}\text{C}$ ) | Phase     | Ionic conductivity<br>( $\text{S cm}^{-1}$ )      | Activation Energy<br>( $\text{kJ mol}^{-1}$ ) | Reference     |
|--------------------------------------------------------------------------------------|----------------------------------------------|-----------|---------------------------------------------------|-----------------------------------------------|---------------|
| Li(CB <sub>9</sub> H <sub>10</sub> )                                                 | 90                                           | Low- $T$  | $3.6 \times 10^{-6}$<br>(25 $^{\circ}\text{C}$ )  | –                                             | 1             |
|                                                                                      |                                              | High- $T$ | $8.1 \times 10^{-2}$<br>(110 $^{\circ}\text{C}$ ) | 28.9                                          | 1             |
| Li(CB <sub>11</sub> H <sub>12</sub> )                                                | 120                                          | Low- $T$  | $5.2 \times 10^{-5}$<br>(33 $^{\circ}\text{C}$ )  | –                                             | 4             |
|                                                                                      |                                              | High- $T$ | $2.0 \times 10^{-1}$<br>(150 $^{\circ}\text{C}$ ) | 24.1                                          | 4             |
| Li <sub>2</sub> (B <sub>12</sub> H <sub>12</sub> )                                   | 360                                          | Low- $T$  | $2.5 \times 10^{-8}$<br>(30 $^{\circ}\text{C}$ )  | 47.5                                          | 5             |
|                                                                                      |                                              | –         | –                                                 | –                                             | –             |
| 0.7Li(CB <sub>9</sub> H <sub>10</sub> )<br>–0.3Li(CB <sub>11</sub> H <sub>12</sub> ) | <r. t. <sup>a</sup>                          | High- $T$ | $6.7 \times 10^{-3}$<br>(25 $^{\circ}\text{C}$ )  | 28.4                                          | Present study |
|                                                                                      |                                              | High- $T$ | $8.5 \times 10^{-2}$<br>(110 $^{\circ}\text{C}$ ) |                                               | Present study |

<sup>a</sup> r. t. means room temperature.

**Supplementary Table 2 | Crystal systems, space groups, and lattice parameters of low- and high- $T$  phases**

| Material                                                                             | Phase     | Crystal system          | Space group             | Lattice parameter (Å)                     | Reference     |
|--------------------------------------------------------------------------------------|-----------|-------------------------|-------------------------|-------------------------------------------|---------------|
| Li(CB <sub>9</sub> H <sub>10</sub> )                                                 | Low- $T$  | Hexagonal<br>(r. t.)    | $P3c1$<br>( $Z = 6$ )   | $a = 11.81(2)$<br>$c = 10.18(3)$          | Present study |
|                                                                                      | High- $T$ | Hexagonal<br>(150 °C)   | $P31c$<br>( $Z = 2$ )   | $a = 6.829$<br>$c = 10.754$               | 1             |
| Li(CB <sub>11</sub> H <sub>12</sub> )                                                | Low- $T$  | Orthorhombic<br>(r. t.) | $Pca2_1$<br>( $Z = 4$ ) | $a = 9.667$<br>$b = 9.489$<br>$c = 9.727$ | 4             |
|                                                                                      | High- $T$ | Cubic<br>(157 °C)       | –                       | $a = 9.936$                               | 4             |
| Li <sub>2</sub> (B <sub>12</sub> H <sub>12</sub> )                                   | Low- $T$  | Cubic<br>(r. t.)        | $Pa-3$<br>( $Z = 4$ )   | $a = 9.577$                               | 6             |
|                                                                                      | High- $T$ | Cubic<br>(360 °C)       | $Pa-3$<br>( $Z = 4$ )   | $a = 10.017$                              | 7             |
| 0.7Li(CB <sub>9</sub> H <sub>10</sub> )<br>–0.3Li(CB <sub>11</sub> H <sub>12</sub> ) | High- $T$ | Hexagonal<br>(r. t.)    | $P31c$<br>( $Z = 2$ )   | $a = 6.86(1)$<br>$c = 10.77(1)$           | Present study |

**Supplementary Table 3 | Quantitative values of circuit components from EIS analyses shown in Supplementary Fig. 13. The 0.7Li(CB<sub>9</sub>H<sub>10</sub>)–0.3Li(CB<sub>11</sub>H<sub>12</sub>)/Li interfacial resistance ( $\Omega \text{ cm}^2$ ) was calculated by dividing  $R_2$  by 2, and then normalizing the result by the surface area.**

| $R_1$ ( $\Omega$ ) | $R_2$ ( $\Omega$ ) | $C_2$ (F)             |
|--------------------|--------------------|-----------------------|
| 26.5               | 1.98               | $1.84 \times 10^{-6}$ |



**Supplementary Table 4 | Interfacial resistances between solid electrolytes and lithium metal anodes measured using EIS analyses.**

| Solid electrolyte                                                                                           | Buffer layer                   | Interfacial resistance ( $\Omega$ cm <sup>2</sup> ) | Reference       |
|-------------------------------------------------------------------------------------------------------------|--------------------------------|-----------------------------------------------------|-----------------|
| 0.7Li(CB <sub>9</sub> H <sub>10</sub> )–0.3Li(CB <sub>11</sub> H <sub>12</sub> )                            | –                              | 0.78                                                | Present study   |
| Al–substituted Li <sub>7</sub> La <sub>3</sub> Zr <sub>2</sub> O <sub>12</sub>                              | –                              | 109                                                 | 8               |
| Li <sub>7</sub> La <sub>3</sub> Zr <sub>2</sub> O <sub>12</sub>                                             | –                              | 512                                                 | 9               |
| Li <sub>7</sub> La <sub>2.75</sub> Ca <sub>0.25</sub> Zr <sub>1.75</sub> Nb <sub>0.25</sub> O <sub>12</sub> | Al <sub>2</sub> O <sub>3</sub> | 34                                                  | 10 <sup>a</sup> |
| Al–contaminated Li <sub>6.6</sub> La <sub>3</sub> Zr <sub>1.6</sub> Ta <sub>0.4</sub> O <sub>12</sub>       | Au                             | 380                                                 | 11              |
| Li <sub>10</sub> GeP <sub>2</sub> S <sub>12</sub>                                                           | –                              | 51 $\Omega$ <sup>b</sup>                            | 12              |
| Li <sub>6.75</sub> La <sub>3</sub> Zr <sub>1.75</sub> Ta <sub>0.25</sub> O <sub>12</sub>                    | –                              | 650 $\Omega$ <sup>b</sup>                           | 13              |

<sup>a</sup> For ref. 10, the interfacial resistance was also evaluated using the DC method. Our experiments suggest that, for battery systems in which resistances of the solid electrolyte and solid electrolyte/electrode interface are extremely small, as in the present work, the evaluation of the interfacial resistance using the DC method should be reconsidered because low–external–resistance components, which are attributed to contributions of electrodes and cells, significantly affect the total resistance.

<sup>b</sup> The surface area was not reported.

### Supplementary Note 1 | Structures of *closo*-type complex anions.

*Closo*-type materials contain so-called *closo*-type complex anions (such as  $(B_{12}H_{12})^{2-}$ ,  $(CB_{11}H_{12})^{-}$ , and  $(CB_9H_{10})^{-}$ ), in which the boron, carbon, and hydrogen atoms form unique covalent bonding patterns (boron–boron, boron–carbon, boron–hydrogen, and carbon–hydrogen), giving rise to a robust and stable cage–like polyanionic structure<sup>14</sup>. The  $(CB_9H_{10})^{-}$  complex anions have a bicapped–square–antiprismatic structure (Supplementary Fig. 1a). The  $(CB_{11}H_{12})^{-}$  complex anions have an icosahedral structure (Supplementary Fig. 1b).

**Supplementary Note 2 | Structures and ionic conductivities of  $x\text{Li}(\text{CB}_9\text{H}_{10})-(1-x)\text{Li}(\text{CB}_{11}\text{H}_{12})$ .**

As the temperature increases from 25 to 90 °C,  $\text{Li}(\text{CB}_9\text{H}_{10})$  ( $x = 0$ ) displays a drastic jump in ionic conductivity, which originates from a transition to the high- $T$  phase (Supplementary Fig. 5b). The Arrhenius plot of the ionic conductivities of  $0.9\text{Li}(\text{CB}_9\text{H}_{10})-0.1\text{Li}(\text{CB}_{11}\text{H}_{12})$  ( $x = 0.1$ ) exhibits no linear increase from 25 to 60 °C, indicating the incomplete stabilization of the high- $T$  phase. In addition,  $0.5\text{Li}(\text{CB}_9\text{H}_{10})-0.5\text{Li}(\text{CB}_{11}\text{H}_{12})$  ( $x = 0.5$ ) contains a massive amount of other impurity phases<sup>15</sup>, which is presumably due to the high  $(\text{CB}_{11}\text{H}_{12})^-$  content exceeding the solid-solution region (Supplementary Fig. 5a).

**Supplementary Note 3 | Structure change of starting materials after mechanical ball-milling.**

Neither starting material displays structural changes after mechanical ball-milling (Supplementary Fig. 7). The broadened XRD peaks after mechanical ball-milling are presumably due to decreased crystallinity.

#### **Supplementary Note 4 | Effects of ball-milling and heat-treatment on conductivity.**

The impedance results of ball-milled  $\text{Li}(\text{CB}_9\text{H}_{10})$  and heat-treated  $0.7\text{Li}(\text{CB}_9\text{H}_{10})-0.3\text{Li}(\text{CB}_{11}\text{H}_{12})$  indicate that the size has a negligible effect on ionic conductivity (Supplementary Fig. 10).

### Supplementary Note 5 | *Closo*-type complex hydride ionic conductors.

Various *closo*-type complex hydrides have been investigated for sodium ion conductors<sup>16-18</sup>. In general, sodium-based complex hydrides have crystal structures, solid-solution regions, and properties different from those of their lithium-based counterparts<sup>15,19,20</sup>. Moreover, differences between the properties of lithium- and sodium-based compounds have been confirmed for most other battery materials. These differences are attributed to differences in the properties, such as size and polarizability<sup>21</sup>, of the constituent cations. Therefore, different design principles based on material properties are needed for lithium- and sodium-based complex hydride ionic conductors.

### Supplementary Note 6 | Lithium diffusion coefficient of 0.7Li(CB<sub>9</sub>H<sub>10</sub>)–0.3Li(CB<sub>11</sub>H<sub>12</sub>).

The activation energy of the self-diffusion coefficient was 30.2 kJ mol<sup>-1</sup> (Fig. 2c and Supplementary Fig. 11), which is comparable to that of ionic conductivity. The conductivity diffusion coefficient ( $D_\sigma$ ) shown in Fig. 2c was calculated using the Nernst–Einstein equation, shown in equation (1):

$$D_\sigma = \frac{k_B T}{n(z e)^2} \sigma \quad (1)$$

where  $D_\sigma$  is the conductivity diffusion coefficient,  $k_B$  is the Boltzmann constant,  $T$  is the absolute temperature,  $n$  is the concentration of mobile ions,  $z$  is the valence of the ions,  $e$  is the elemental charge, and  $\sigma$  is the conductivity. The lithium ion concentration ( $n = 4.6 \times 10^{27}$  m<sup>-3</sup>) was calculated from the unit cell volume ( $V/Z = 219$  Å<sup>3</sup>) and the composition of 0.7Li(CB<sub>9</sub>H<sub>10</sub>)–0.3Li(CB<sub>11</sub>H<sub>12</sub>).

### Supplementary Note 7 | EIS analyses of a Li/0.7Li(CB<sub>9</sub>H<sub>10</sub>)–0.3Li(CB<sub>11</sub>H<sub>12</sub>)/Li cell

The ionic conductivity ( $6.7 \times 10^{-3} \text{ S cm}^{-1}$ ) calculated from the high-frequency  $x$ -intercept ( $R_1$  in Supplementary Fig. 13 and Supplementary Table 3) of the semicircle agrees well with that ( $6.7 \times 10^{-3} \text{ S cm}^{-1}$ ) estimated from the Au/0.7Li(CB<sub>9</sub>H<sub>10</sub>)–0.3Li(CB<sub>11</sub>H<sub>12</sub>)/Au cell (Fig. 2a). Empirically, capacitances of the bulk, grain boundary, and interface regions for ionic conduction are on the order of  $10^{-12}$ ,  $10^{-9}$ , and  $10^{-6}$  F, respectively<sup>22</sup>. According to our fitting, the capacitance component ( $C_2$ ) of the semicircle is on the order of  $10^{-6}$  F (Supplementary Table 3), and hence the observed impedance ( $R_2$ ) corresponds to an electrode/electrolyte interfacial resistance.



### **Supplementary Note 8 | Discharge–charge performances for prolonged cycles**

The single plateau in the discharge process indicates that the formation of soluble long–chain polysulfides, which is a typical problem for liquid–electrolyte–based batteries<sup>23</sup>, is avoided (Supplementary Fig. 16a). In this study, the cathode composites were prepared by simple hand–mixing of a S–C composite and the complex hydride solid electrolyte. The cell performances can be further enhanced by improving the fabrication technology used for the S–C–complex hydride composite<sup>24</sup>.

## Supplementary References

1. Tang, W. S. *et al.* Liquid-like ionic conduction in solid lithium and sodium monocarba-*closo*-decaborates near or at room temperature. *Adv. Energy Mater.* **6**, 1502237 (2016).
2. Stejskal, E. O. & Tanner J. E. Spin diffusion measurements: Spin echoes in the presence of a time-dependent field gradient. *J. Chem. Phys.* **42**, 288–292 (1965).
3. Hayamizu, K. & Aihara Y. Lithium ion diffusion in solid electrolyte  $(\text{Li}_2\text{S})_7(\text{P}_2\text{S}_5)_3$  measured by pulsed-gradient spin-echo  $^7\text{Li}$  NMR spectroscopy. *Solid State Ionics* **238**, 7–14 (2013).
4. Tang, W. S. *et al.* Unparalleled lithium and sodium superionic conduction in solid electrolytes with large monovalent cage-like anions. *Energy Environ. Sci.* **8**, 3637–3645 (2015).
5. Kim, S. *et al.* Fast lithium-ion conduction in atom-deficient *closo*-type complex hydride solid electrolytes. *Chem. Mater.* **30**, 386–391 (2018).
6. Her, J. *et al.* Crystal structure of  $\text{Li}_2\text{B}_{12}\text{H}_{12}$ : a possible intermediate species in the decomposition of  $\text{LiBH}_4$ . *Inorg. Chem* **47**, 9757–9759 (2008).
7. Paskevicius, M. *et al.* First-order phase transition in the  $\text{Li}_2\text{B}_{12}\text{H}_{12}$  system. *Phys. Chem. Chem. Phys.* **15**, 15825–15828 (2013).
8. Cheng, L. *et al.* The origin of high electrolyte-electrode interfacial resistances in lithium cells containing garnet type solid electrolytes. *Phys. Chem. Chem. Phys.* **16**, 18294–18300 (2014).
9. Sharafi, A. *et al.* Characterizing the  $\text{Li-Li}_7\text{La}_3\text{Zr}_2\text{O}_{12}$  interface stability and kinetics as a function of temperature and current density. *J. Power Sources* **302**, 135–139 (2016).
10. Han, X. *et al.* Negating interfacial impedance in garnet-based solid-state Li metal batteries. *Nat. Mater.* **16**, 572–579 (2017).
11. Tsai, C. *et al.*  $\text{Li}_7\text{La}_3\text{Zr}_2\text{O}_{12}$  interface modification for Li dendrite prevention. *ACS Appl. Mater. Interfaces* **8**, 10617–10626 (2016).
12. Oh, G. *et al.* Bulk-type all solid-state batteries with 5 V class  $\text{LiNi}_{0.5}\text{Mn}_{1.5}\text{O}_4$  cathode and  $\text{Li}_{10}\text{GeP}_2\text{S}_{12}$  solid electrolyte. *Chem. Mater.* **28**, 2634–2640 (2016).

13. Liu, T. *et al.* Achieving high capacity in bulk-type solid-state lithium ion battery based on  $\text{Li}_{6.75}\text{La}_3\text{Zr}_{1.75}\text{Ta}_{0.25}\text{O}_{12}$  electrolyte: Interfacial resistance. *J. Power Sources* **324**, 349–357 (2016).
14. Hansen, B. R. S. *et al.* Metal boranes: progress and applications. *Coord. Chem. Rev.* **323**, 60–70 (2016).
15. Tang, W. S. *et al.* Stabilizing superionic-conducting structures via mixed-anion solid solutions of monocarba-*closo*-borate salts. *ACS Energy Lett.* **1**, 659–664 (2016).
16. Duchêne, L. *et al.* A stable 3 V all–solid–state sodium–ion battery based on a *closo*-borate electrolyte. *Energy Environ. Sci.* **10**, 2609–2615 (2017).
17. Duchêne, L. *et al.* A highly stable sodium solid-state electrolyte based on a dodeca/deca–borate equimolar mixture. *Chem. Commun.* **53**, 4195–4198 (2017).
18. Brighi, M. *et al.* A mixed anion hydroborate/carba–hydroborate as a room temperature Na–ion solid electrolyte. *J. Power Sources* **404**, 7–12 (2018).
19. Orimo, S. *et al.* Complex hydrides for hydrogen storage. *Chem. Rev.* **107**, 4111–4132 (2007).
20. Paskevicius, M. *et al.* Metal borohydrides and derivatives - synthesis, structure and properties. *Chem. Soc. Rev.* **46**, 1565–1634 (2017).
21. Yabuuchi, N., Kubota K., Dahbi M. & Komaba S. Research development on sodium-ion batteries. *Chem. Rev.* **114**, 11636–11682 (2014).
22. Felice, C. J. *et al.* Impedance microbiology: quantification of bacterial content in milk by means of capacitance growth curves. *J. Microbiol. Meth.* **35**, 37–42 (1999).
23. Bresser, D., Passerini S. & Scrosati B. Recent progress and remaining challenges in sulfur-based lithium secondary batteries – a review. *Chem. Commun.* **49**, 10545–10562 (2013).
24. Suzuki, K. *et al.* High cycle capability of all-solid-state lithium–sulfur batteries using composite electrodes by liquid-phase and mechanical mixing. *ACS Appl. Mater. Interfaces* **1**, 2373–2377 (2018).
